# Supplementary material for: Detection of concanavalin A based on attenuated fluorescence resonance energy transfer between quantum dots and mannose-stabilized gold nanoparticles
Source: Royal Society of Chemistry journal article supplement (doi:10.1039/c2ay26128f), 2012-11-14
Supplement: c2ay26128f.pdf [file c2ay26128f.pdf]

## Electronic Supplementary Information

### Detection of concanavaline A based on modulated fluorescence resonance energy transfer between quantum dots and mannose-stabilized gold nanoparticles

Kyung Rae Lim, Kwang-Soo Ahn and Won-Yong Lee\*

Department of Chemistry, Yonsei University, Seoul 120-749, Republic of Korea, Fax: 82-2-364-7050; Tel: 82-2-2123-2649; E-mail: [wylee@yonsei.ac.kr](mailto:wylee@yonsei.ac.kr)

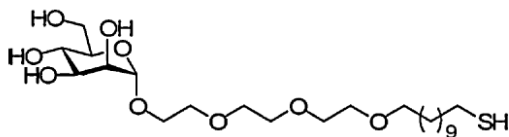

Fig. S1. Chemical structure of thiolated mannose.

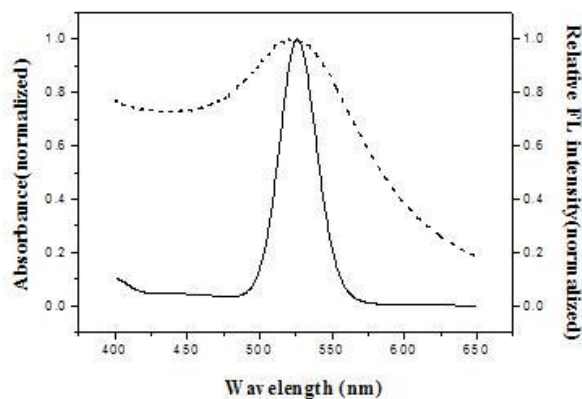

Fig. S2. The absorption spectrum of mannose-stabilized AuNPs (top) and the fluorescence spectrum of amino (PEG) QDs ( $\lambda_{\text{ex}} = 525 \text{ nm}$ ) (bottom).

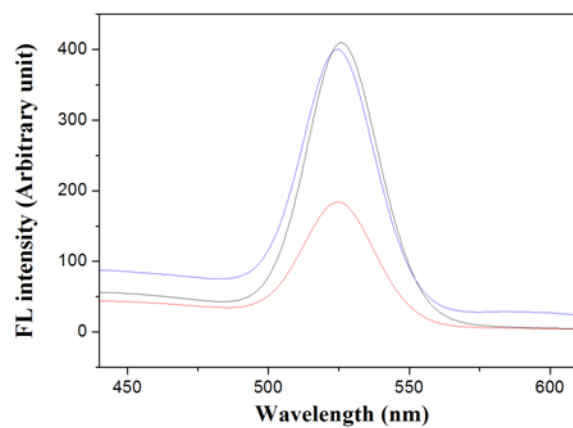

**Fig. S3.** FL spectra of QDs in the absence of AuNPs and Con A (black), in the presence of AuNPs (red) and in the presence of AuNPs and 500  $\mu\text{g/mL}$  Con A (blue) ( $\lambda_{\text{ex}} = 525 \text{ nm}$ ).

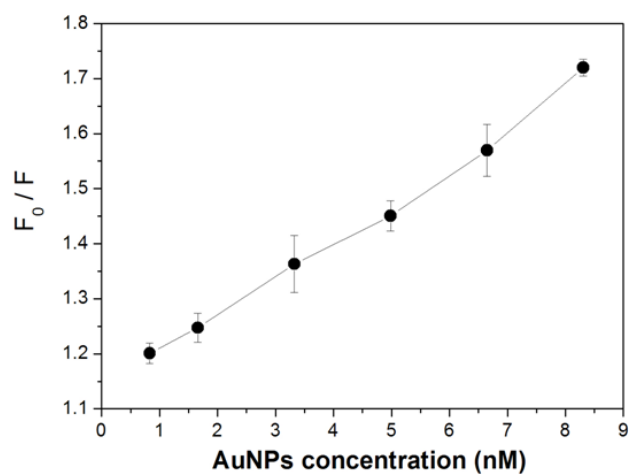

**Fig. S4.** Stern–Volmer plot of  $F_0/F$  versus  $[\text{AuNPs}]$ .
